# Supplementary material
Source: Springer Nature journal article supplement (https://www.springermedizin.de/resource/supplementary/12879_2009_1052_MOESM2_ESM.pdf/9442472)
Supplement: MOESM2 [file 9442472]

# Cumulative Sensitivity (%)

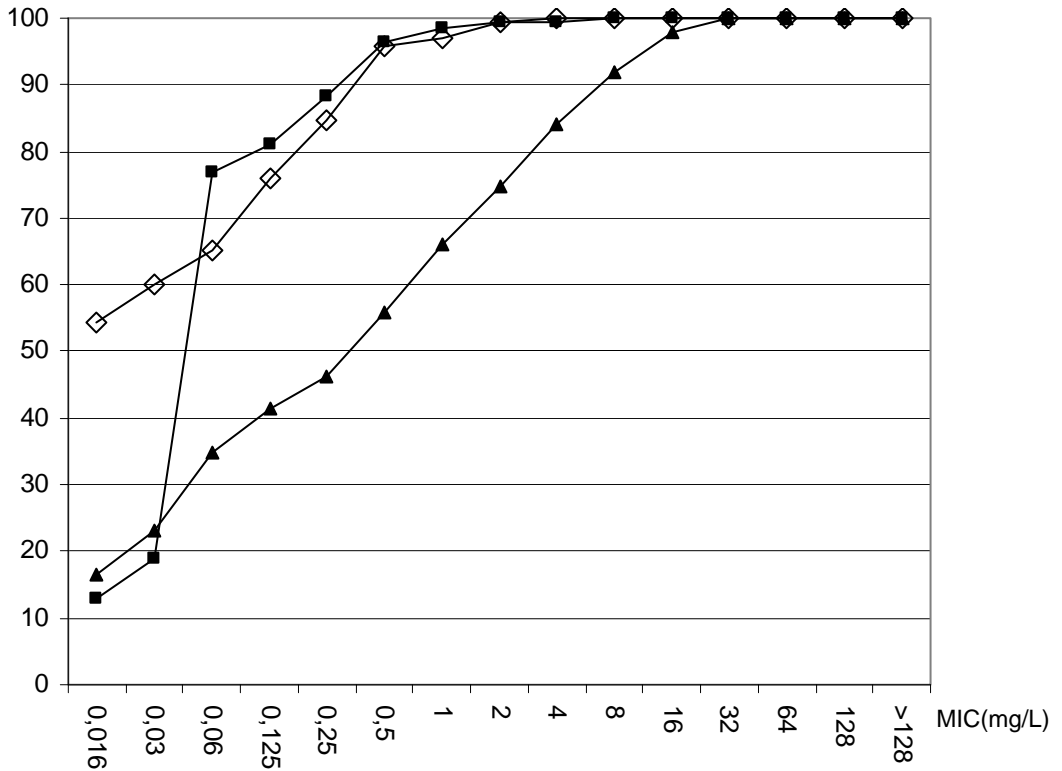

—◇— Meropenem (2-8)\* —■— Imipenem (2-8) —▲— Piperacillin/tazobactam (8-16)

\* MICs breakpoints (EUCAST)
